# Supplementary material
Source: PubMed Central journal article supplement (PMC10150908)

**Figure S.** Study population

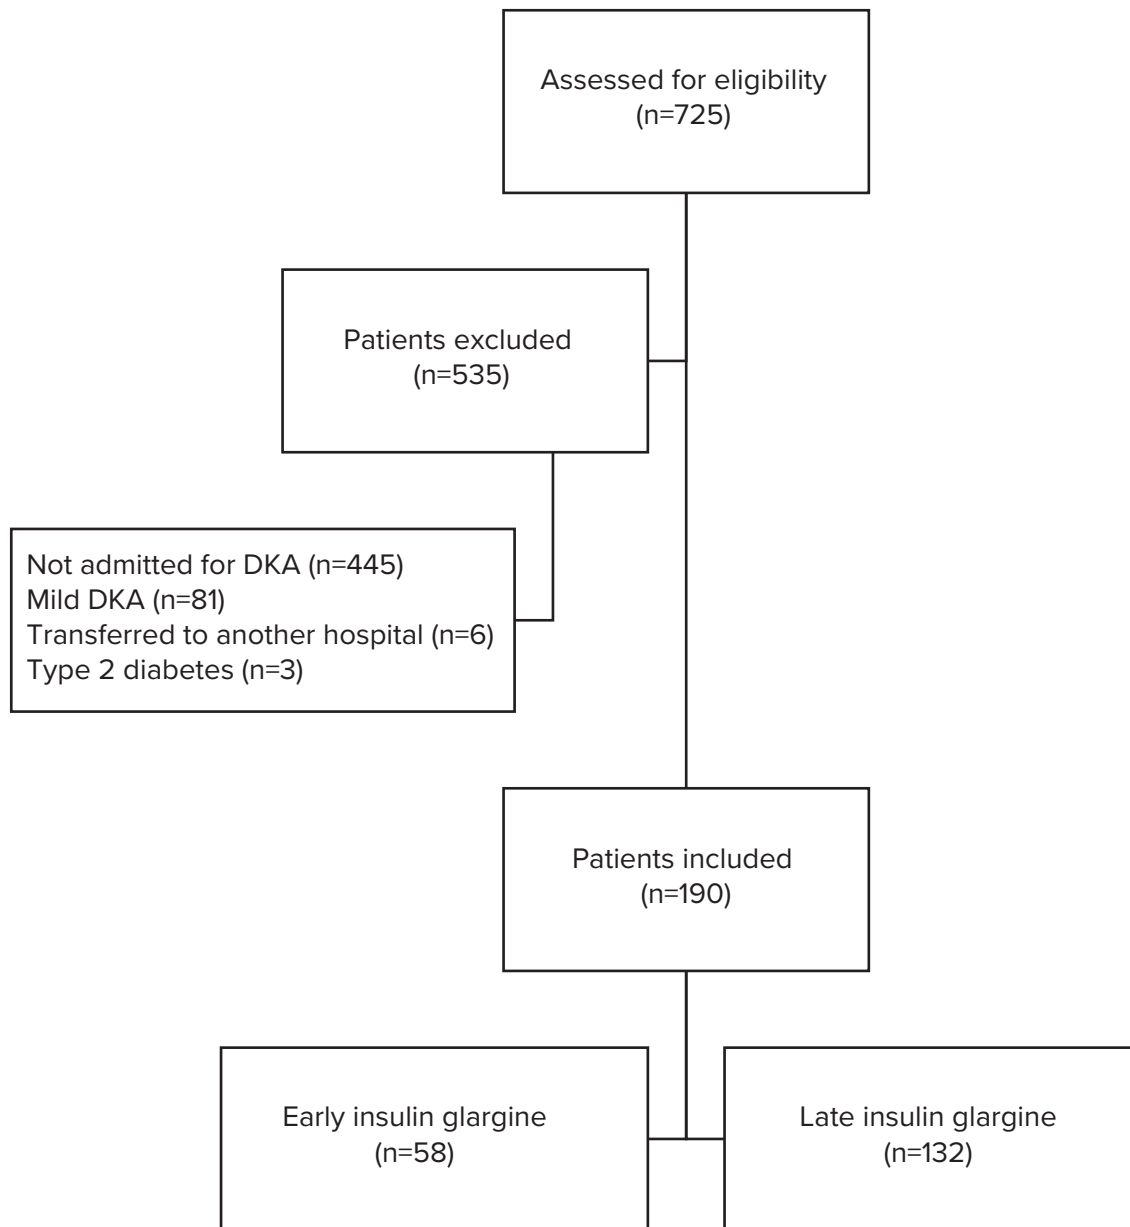

*DKA, diabetic ketoacidosis*

Supplement: i2331-348X-28-2-149_s01.pdf [file i2331-348X-28-2-149_s01.pdf]
